# Supplementary material for: Automatic Generation of Connectivity for Large-Scale Neuronal Network Models through Structural Plasticity
Source: PubMed Central journal article supplement (PMC4880596; doi:10.3389/fnana.2016.00057), 2016-05-26
Supplement: DataSheet2.pdf [file DataSheet2.pdf]

## Appendix A: Stable and unstable parameter setting for the cortical microcircuit model

| Parameter                           | Stable case | Unstable case |
|-------------------------------------|-------------|---------------|
| Growth curve type                   | Gaussian    | Gaussian      |
| Growth rate excitatory dendritic    | 0.0001      | 0.0001        |
| Growth rate excitatory axonal       | 0.00018     | 0.0001        |
| Growth rate inhibitory dendritic    | 0.0001      | 0.0001        |
| Growth rate inhibitory axonal       | 0.00025     | 0.0001        |
| $\eta$ excitatory                   | 0.0         | 0.0           |
| $\eta$ inhibitory                   | 0.0         | 0.0           |
| $\epsilon$ excitatory L23 dendritic | 0.05        | 0.05          |
| $\epsilon$ inhibitory L23 dendritic | 0.2         | 0.2           |
| $\epsilon$ excitatory L23 axonal    | 0.05        | 0.05          |
| $\epsilon$ inhibitory L23 axonal    | 0.2         | 0.2           |
| $\epsilon$ excitatory L4 dendritic  | 0.26        | 0.26          |
| $\epsilon$ inhibitory L4 dendritic  | 0.45        | 0.45          |
| $\epsilon$ excitatory L4 axonal     | 0.26        | 0.26          |
| $\epsilon$ inhibitory L4 axonal     | 0.45        | 0.45          |
| $\epsilon$ excitatory L5 dendritic  | 0.55        | 0.55          |
| $\epsilon$ inhibitory L5 dendritic  | 0.5         | 0.5           |
| $\epsilon$ excitatory L5 axonal     | 0.55        | 0.55          |
| $\epsilon$ inhibitory L5 axonal     | 0.5         | 0.5           |
| $\epsilon$ excitatory L6 dendritic  | 0.35        | 0.35          |
| $\epsilon$ inhibitory L6 dendritic  | 0.59        | 0.59          |
| $\epsilon$ excitatory L6 axonal     | 0.35        | 0.35          |
| $\epsilon$ inhibitory L6 axonal     | 0.59        | 0.59          |

Table 1: Parameters used for simulations of the cortical microcircuit
